# Supplementary material for: Evaluation of the Determination of Dabigatran, Rivaroxaban, and Apixaban in Lupus Anticoagulant-Positive Patients
Source: MDPI journal article supplement (doi:10.3390/diagnostics11112027), 2021-11-02
Supplement: s1 [file s1]

## Article

# Evaluation of the Determination of Dabigatran, Rivaroxaban, and Apixaban in Lupus Anticoagulant-Positive Patients

Jana Úlehlová <sup>1,†</sup>, Barbora Pisklákova <sup>2,†</sup>, Eliška Ivanovová <sup>2</sup>, Jana Procházková <sup>1</sup>, Pavla Bradáčová <sup>1</sup>, Aleš Kvasnička <sup>2</sup>, David Friedecký <sup>2\*</sup>, Luděk Slavík <sup>1\*</sup>

**Citation:** Úlehlová, J.; Pisklákova, B.;

Ivanovová, E.; Procházková, J.;

Bradáčová, P.; Kvasnička, A.;

Friedecký, D.; Slavík, L. Evaluation of the Determination of Dabigatran, Rivaroxaban, and Apixaban in Lupus Anticoagulant-Positive Patients.

*Diagnostics* **2021**, *11*, 2027.

<https://doi.org/10.3390/diagnostics11112027>

<sup>1</sup> Department of Hematology-Oncology, Faculty of Medicine and Dentistry, Palacký University and University Hospital Olomouc, 779 00 Olomouc, Czech Republic; jana.ulehlova@fnol.cz (J.Ú.); jana.prochazkova@fnol.cz (J.P.); pavla.bradacova@kz.cz.eu (P.B.)

<sup>2</sup> Laboratory for Inherited Metabolic Disorders, Department of Clinical Biochemistry, Palacký University and University Hospital Olomouc, 779 00 Olomouc, Czech Republic; barbara.pisklakova@upol.cz (B.P.); eliska.ivanovova@gmail.com (E.I.); ales.kvasnicka01@upol.cz (A.K.)

\* Correspondence: david.friedecky@upol.cz (D.F.); Tel.: +420585852619; ludek.slavik@fnol.cz (L.S.); Tel.: +420585855350

† These authors contributed equally to this work.

Academic Editor: Claudia Maria Radu

Received: 22 September 2021

Accepted: 27 October 2021

Published: 2 November 2021

**Publisher's Note:** MDPI stays neutral with regard to jurisdictional claims in published maps and institutional affiliations.

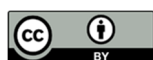

**Copyright:** © 2021 by the authors.

Licensee MDPI, Basel, Switzerland.

This article is an open access article distributed under the terms and conditions of the Creative Commons Attribution (CC BY) license (<http://creativecommons.org/licenses/by/4.0/>).

**Table S1.** Lupus LSR levels and concentrations of direct anticoagulant levels evaluated by functional tests or by HPLC-MS/MS method before and after DOAC Stop procedure. All concentration values are in units ng/ml.

| Patient | Lupus anticoagulants (LSR) | DABI_FA | DABI_LC-MS | RIVA_FA | RIVA_LC-MS | API_FA | API_LC-MS | DABI_FA_DS | DABI_LC-MS_DS | RIVA_FA_DS | RIVA_LC-MS_DS | API_FA_DS | API_LC-MS_DS |
|---------|----------------------------|---------|------------|---------|------------|--------|-----------|------------|---------------|------------|---------------|-----------|--------------|
| P1      | 2.19                       | 110.80  | 30.37      | 109.90  | 31.90      | 104.50 | 346.30    | 76.70      | 0.12          | 88.80      | 0.73          | 96.00     | 21.86        |
| P2      | 1.36                       | 103.30  | 25.47      | 91.30   | 34.26      | 107.10 | 499.30    | 63.80      | 0.44          | 62.10      | 0.10          | 100.90    | 34.74        |
| P3      | 2.13                       | 168.00  | 50.25      | 154.00  | 46.91      | 144.20 | 269.30    | 111.40     | 0.39          | 113.30     | 0.67          | 123.80    | 23.05        |
| P4      | 1.78                       | 90.40   | 37.82      | 101.20  | 38.12      | 72.90  | 373.90    | 64.80      | 0.32          | 74.50      | 0.42          | 74.00     | 9.75         |
| P5      | 1.51                       | 76.70   | 32.41      | 77.40   | 40.14      | 74.80  | 246.80    | 50.20      | 0.22          | 46.60      | 0.10          | 78.80     | 2.13         |
| P6      | 1.63                       | 68.00   | 32.49      | 61.20   | 49.89      | 72.20  | 215.70    | 44.40      | 0.22          | 54.90      | 1.16          | 76.80     | 0.10         |
| P7      | 2.56                       | 90.80   | 27.61      | 87.10   | 49.13      | 113.80 | 212.00    | 68.90      | 0.25          | 79.40      | 0.53          | 82.30     | 3.72         |
| P8      | 1.23                       | 76.90   | 57.68      | 72.60   | 71.44      | 105.80 | 200.20    | 47.10      | 0.31          | 45.40      | 0.67          | 66.90     | 3.60         |
| P9      | 1.96                       | 106.00  | 51.19      | 133.10  | 85.17      | 115.10 | 186.80    | 59.10      | 0.19          | 66.30      | 1.01          | 77.50     | 2.40         |
| P10     | 1.30                       | 86.00   | 56.57      | 74.80   | 81.93      | 110.90 | 218.00    | 42.60      | 0.27          | 45.20      | 1.51          | 66.50     | 3.95         |
| P11     | 1.74                       | 106.10  | 58.53      | 88.60   | 83.03      | 100.50 | 218.60    | 61.20      | 0.32          | 61.40      | 1.09          | 70.40     | 3.17         |
| P12     | 3.72                       | 228.00  | 59.90      | 182.00  | 89.54      | 235.00 | 225.40    | 123.20     | 2.56          | 114.20     | 1.56          | 118.60    | 6.68         |
| P13     | 1.66                       | 96.90   | 58.47      | 104.00  | 87.77      | 125.40 | 228.00    | 57.90      | 0.32          | 54.50      | 0.36          | 70.70     | 1.86         |
| P14     | 5.95                       | 235.00  | 65.86      | 235.00  | 93.02      | 235.00 | 221.00    | 213.20     | 0.52          | 218.30     | 1.44          | 146.60    | 2.43         |
| P15     | 1.48                       | 73.80   | 55.01      | 69.50   | 91.98      | 106.10 | 227.50    | 52.10      | 0.29          | 51.20      | 0.67          | 67.10     | 4.09         |
| P16     | 1.34                       | 90.30   | 69.80      | 61.00   | 94.07      | 89.70  | 219.10    | 46.50      | 0.28          | 45.10      | 0.28          | 58.60     | 2.80         |
| P17     | 1.87                       | 114.80  | 58.79      | 91.30   | 100.20     | 106.50 | 240.60    | 65.80      | 0.78          | 65.50      | 1.32          | 65.70     | 3.83         |
| P18     | 1.42                       | 87.20   | 47.37      | 57.50   | 95.76      | 112.10 | 193.30    | 53.30      | 0.32          | 50.40      | 3.81          | 67.10     | 6.39         |
| P19     | 2.39                       | 119.90  | 59.82      | 107.00  | 52.02      | 95.00  | 317.20    | 74.70      | 0.45          | 71.40      | 0.49          | 92.30     | 13.74        |
| P20     | 1.53                       | 109.60  | 69.64      | 77.60   | 97.03      | 91.50  | 322.00    | 58.10      | 0.33          | 55.50      | 1.17          | 80.50     | 2.98         |
| P21     | 1.46                       | 110.10  | 60.36      | 88.20   | 90.06      | 121.00 | 282.60    | 53.60      | 0.28          | 54.10      | 0.37          | 86.50     | 3.15         |
| P22     | 1.35                       | 92.40   | 58.81      | 84.90   | 107.80     | 79.20  | 387.50    | 53.40      | 0.36          | 51.90      | 1.80          | 74.00     | 7.98         |
| P23     | 2.13                       | 137.30  | 51.35      | 150.90  | 88.80      | 118.80 | 206.20    | 86.20      | 0.21          | 86.10      | 0.33          | 74.40     | 13.59        |
| P24     | 2.50                       | 143.70  | 53.57      | 126.00  | 45.49      | 102.70 | 223.60    | 67.20      | 0.17          | 77.90      | 0.33          | 66.90     | 6.29         |
| P25     | 1.57                       | 76.80   | 48.16      | 81.60   | 92.84      | 91.10  | 294.30    | 46.40      | 0.16          | 48.80      | 0.70          | 62.60     | 5.16         |
| P26     | 1.45                       | 76.70   | 29.30      | 61.30   | 59.27      | 104.40 | 234.50    | 48.90      | 0.27          | 46.50      | 0.10          | 65.60     | 1.38         |
| P27     | 1.81                       | 98.80   | 21.01      | 99.60   | 67.80      | 114.00 | 158.30    | 59.90      | 0.12          | 58.50      | 0.75          | 68.10     | 1.49         |
| P28     | 1.61                       | 84.30   | 44.85      | 80.50   | 94.87      | 112.40 | 198.70    | 49.90      | 0.17          | 50.80      | 0.89          | 69.70     | 2.29         |
| P29     | 1.29                       | 69.70   | 48.80      | 69.40   | 84.12      | 83.60  | 225.40    | 44.80      | 0.26          | 43.50      | 0.72          | 57.90     | 1.77         |
| P30     | 3.30                       | 140.20  | 36.52      | 156.10  | 72.72      | 130.10 | 205.30    | 93.50      | 0.16          | 98.00      | 0.94          | 79.20     | 2.04         |
| P31     | 1.41                       | 73.00   | 40.58      | 70.70   | 76.32      | 70.80  | 232.70    | 45.00      | 0.10          | 45.80      | 0.74          | 57.80     | 1.68         |

Abbreviations: DABI, dabigatran; RIVA, rivaroxaban; API, apixaban; FA, functional assay; DS, DOAC-Stop procedure
